# Supplementary material
Source: Springer Nature journal article supplement (https://www.springermedizin.de/resource/supplementary/13058_2012_3052_MOESM10_ESM.pdf/9703162)

**A** Am580 NR Am580 R

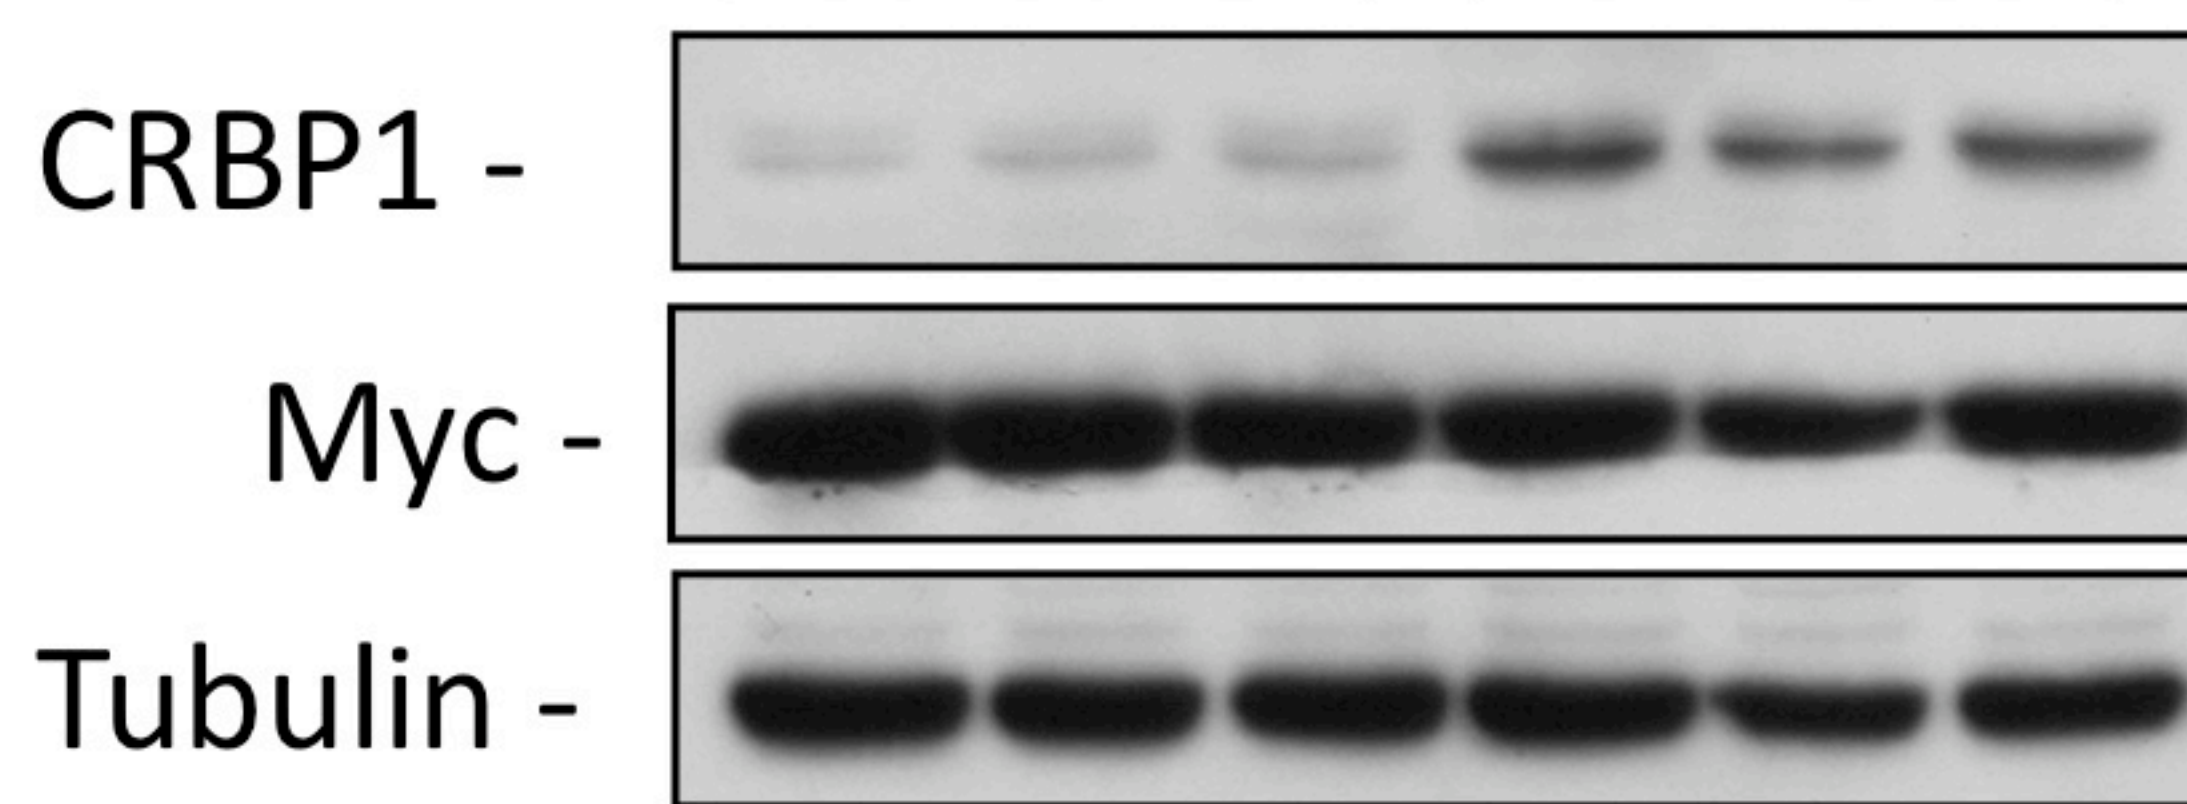

**B**

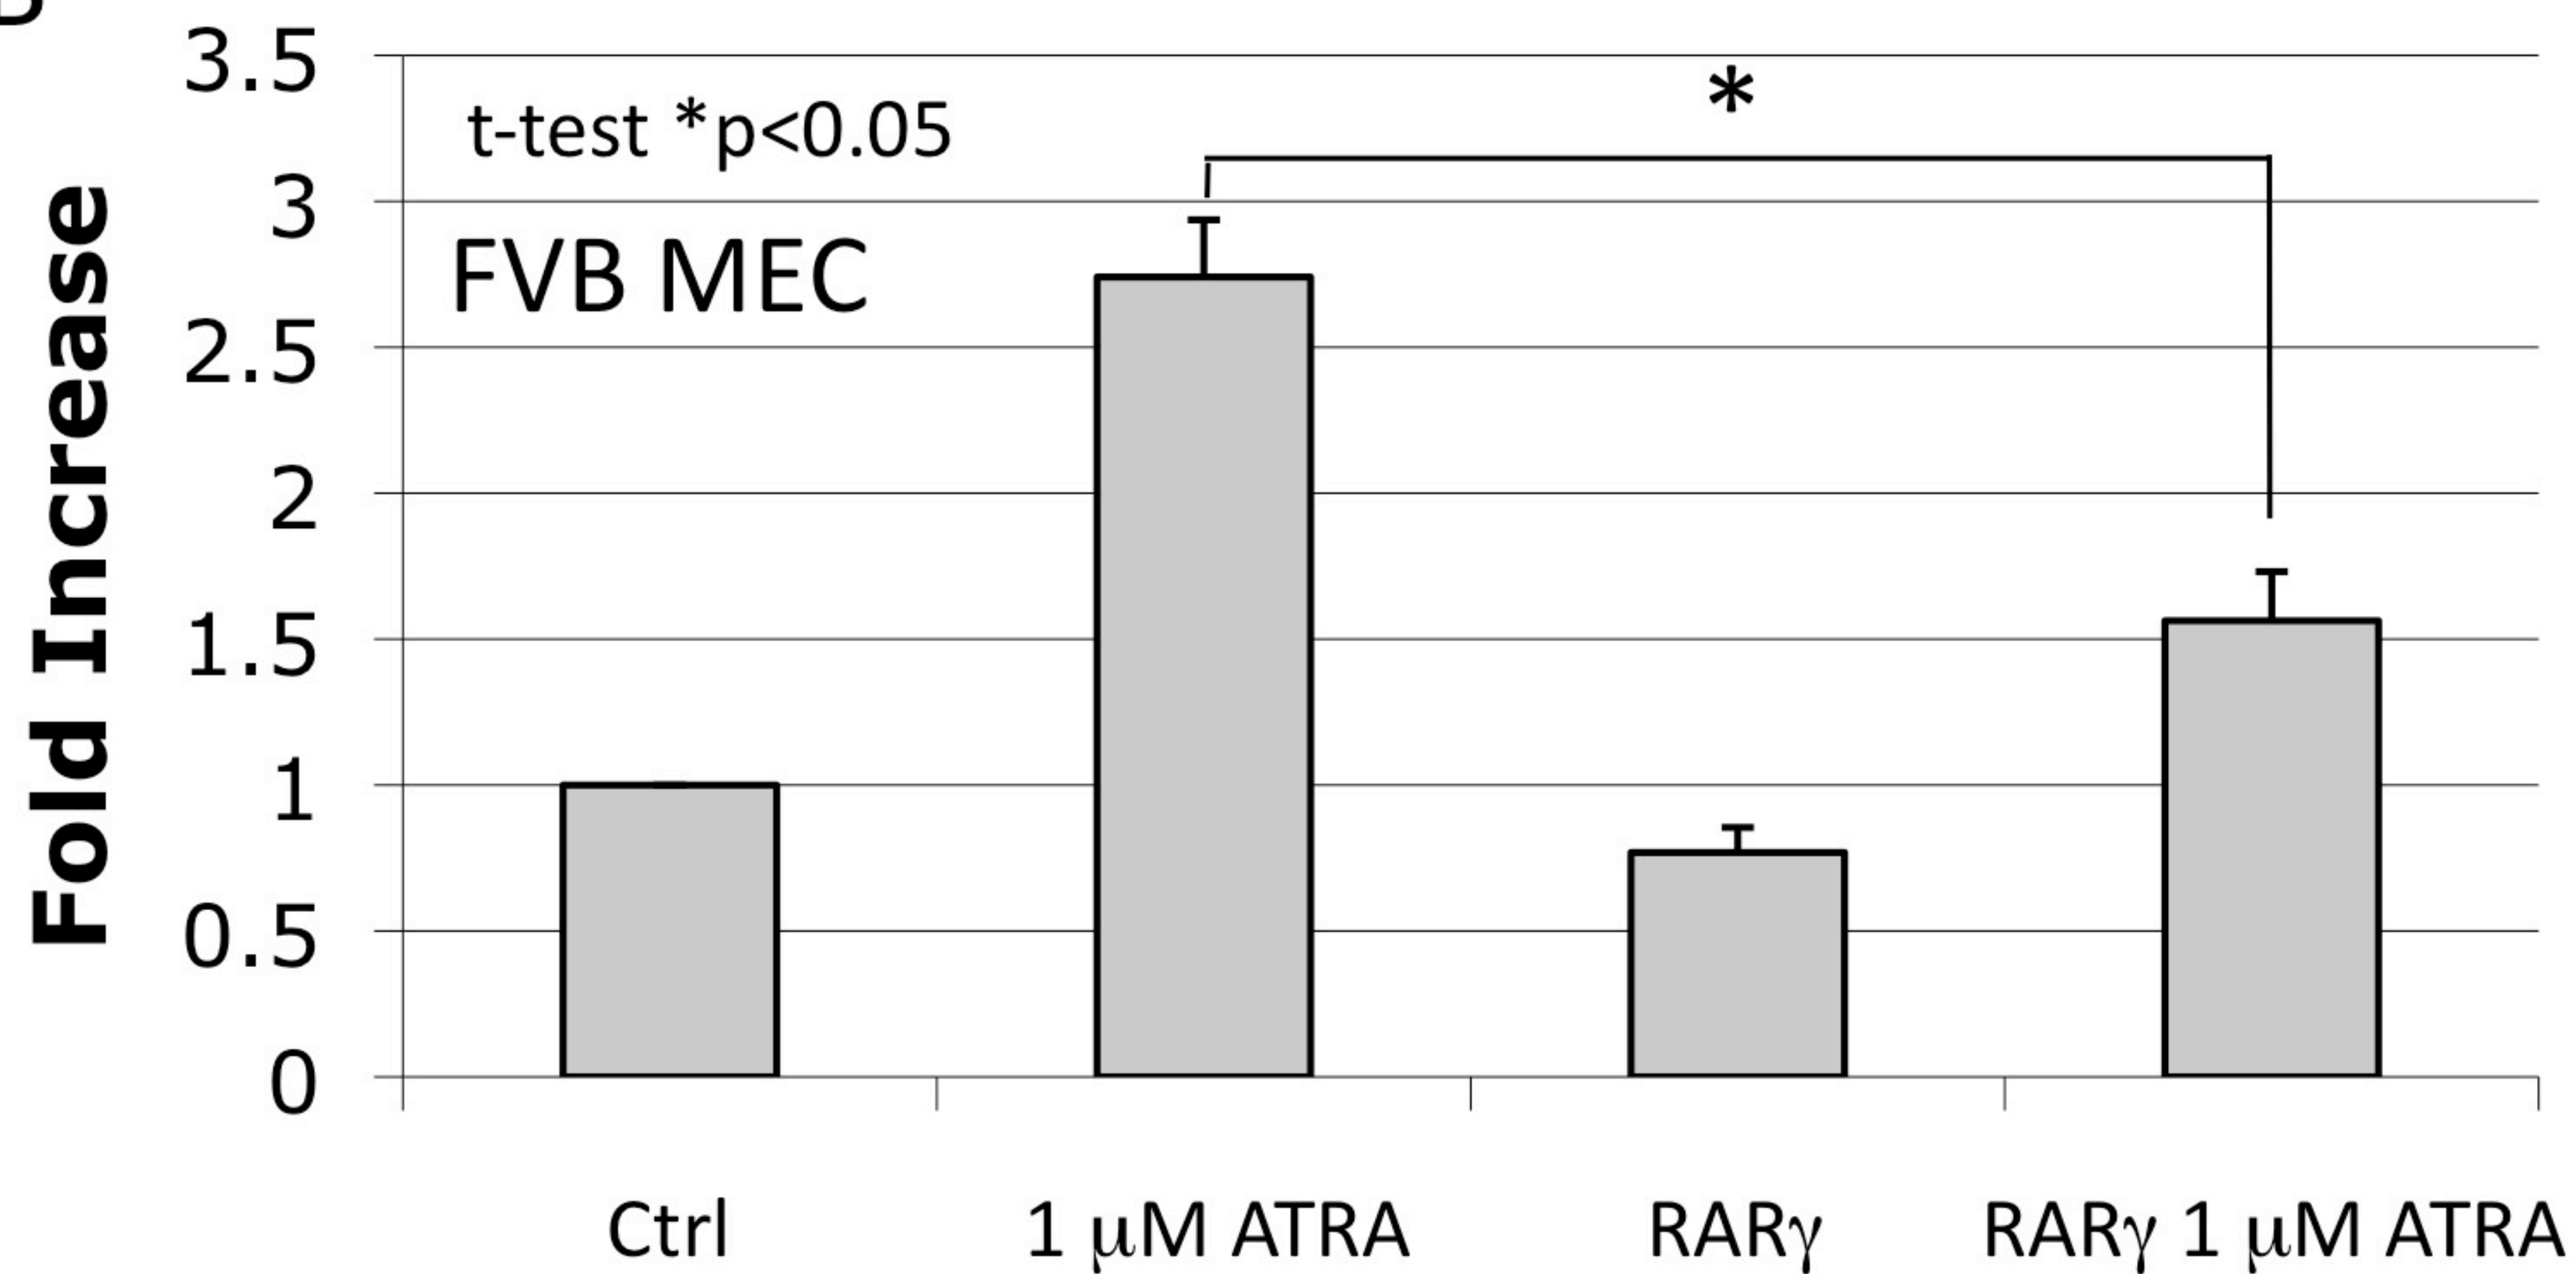

**C**

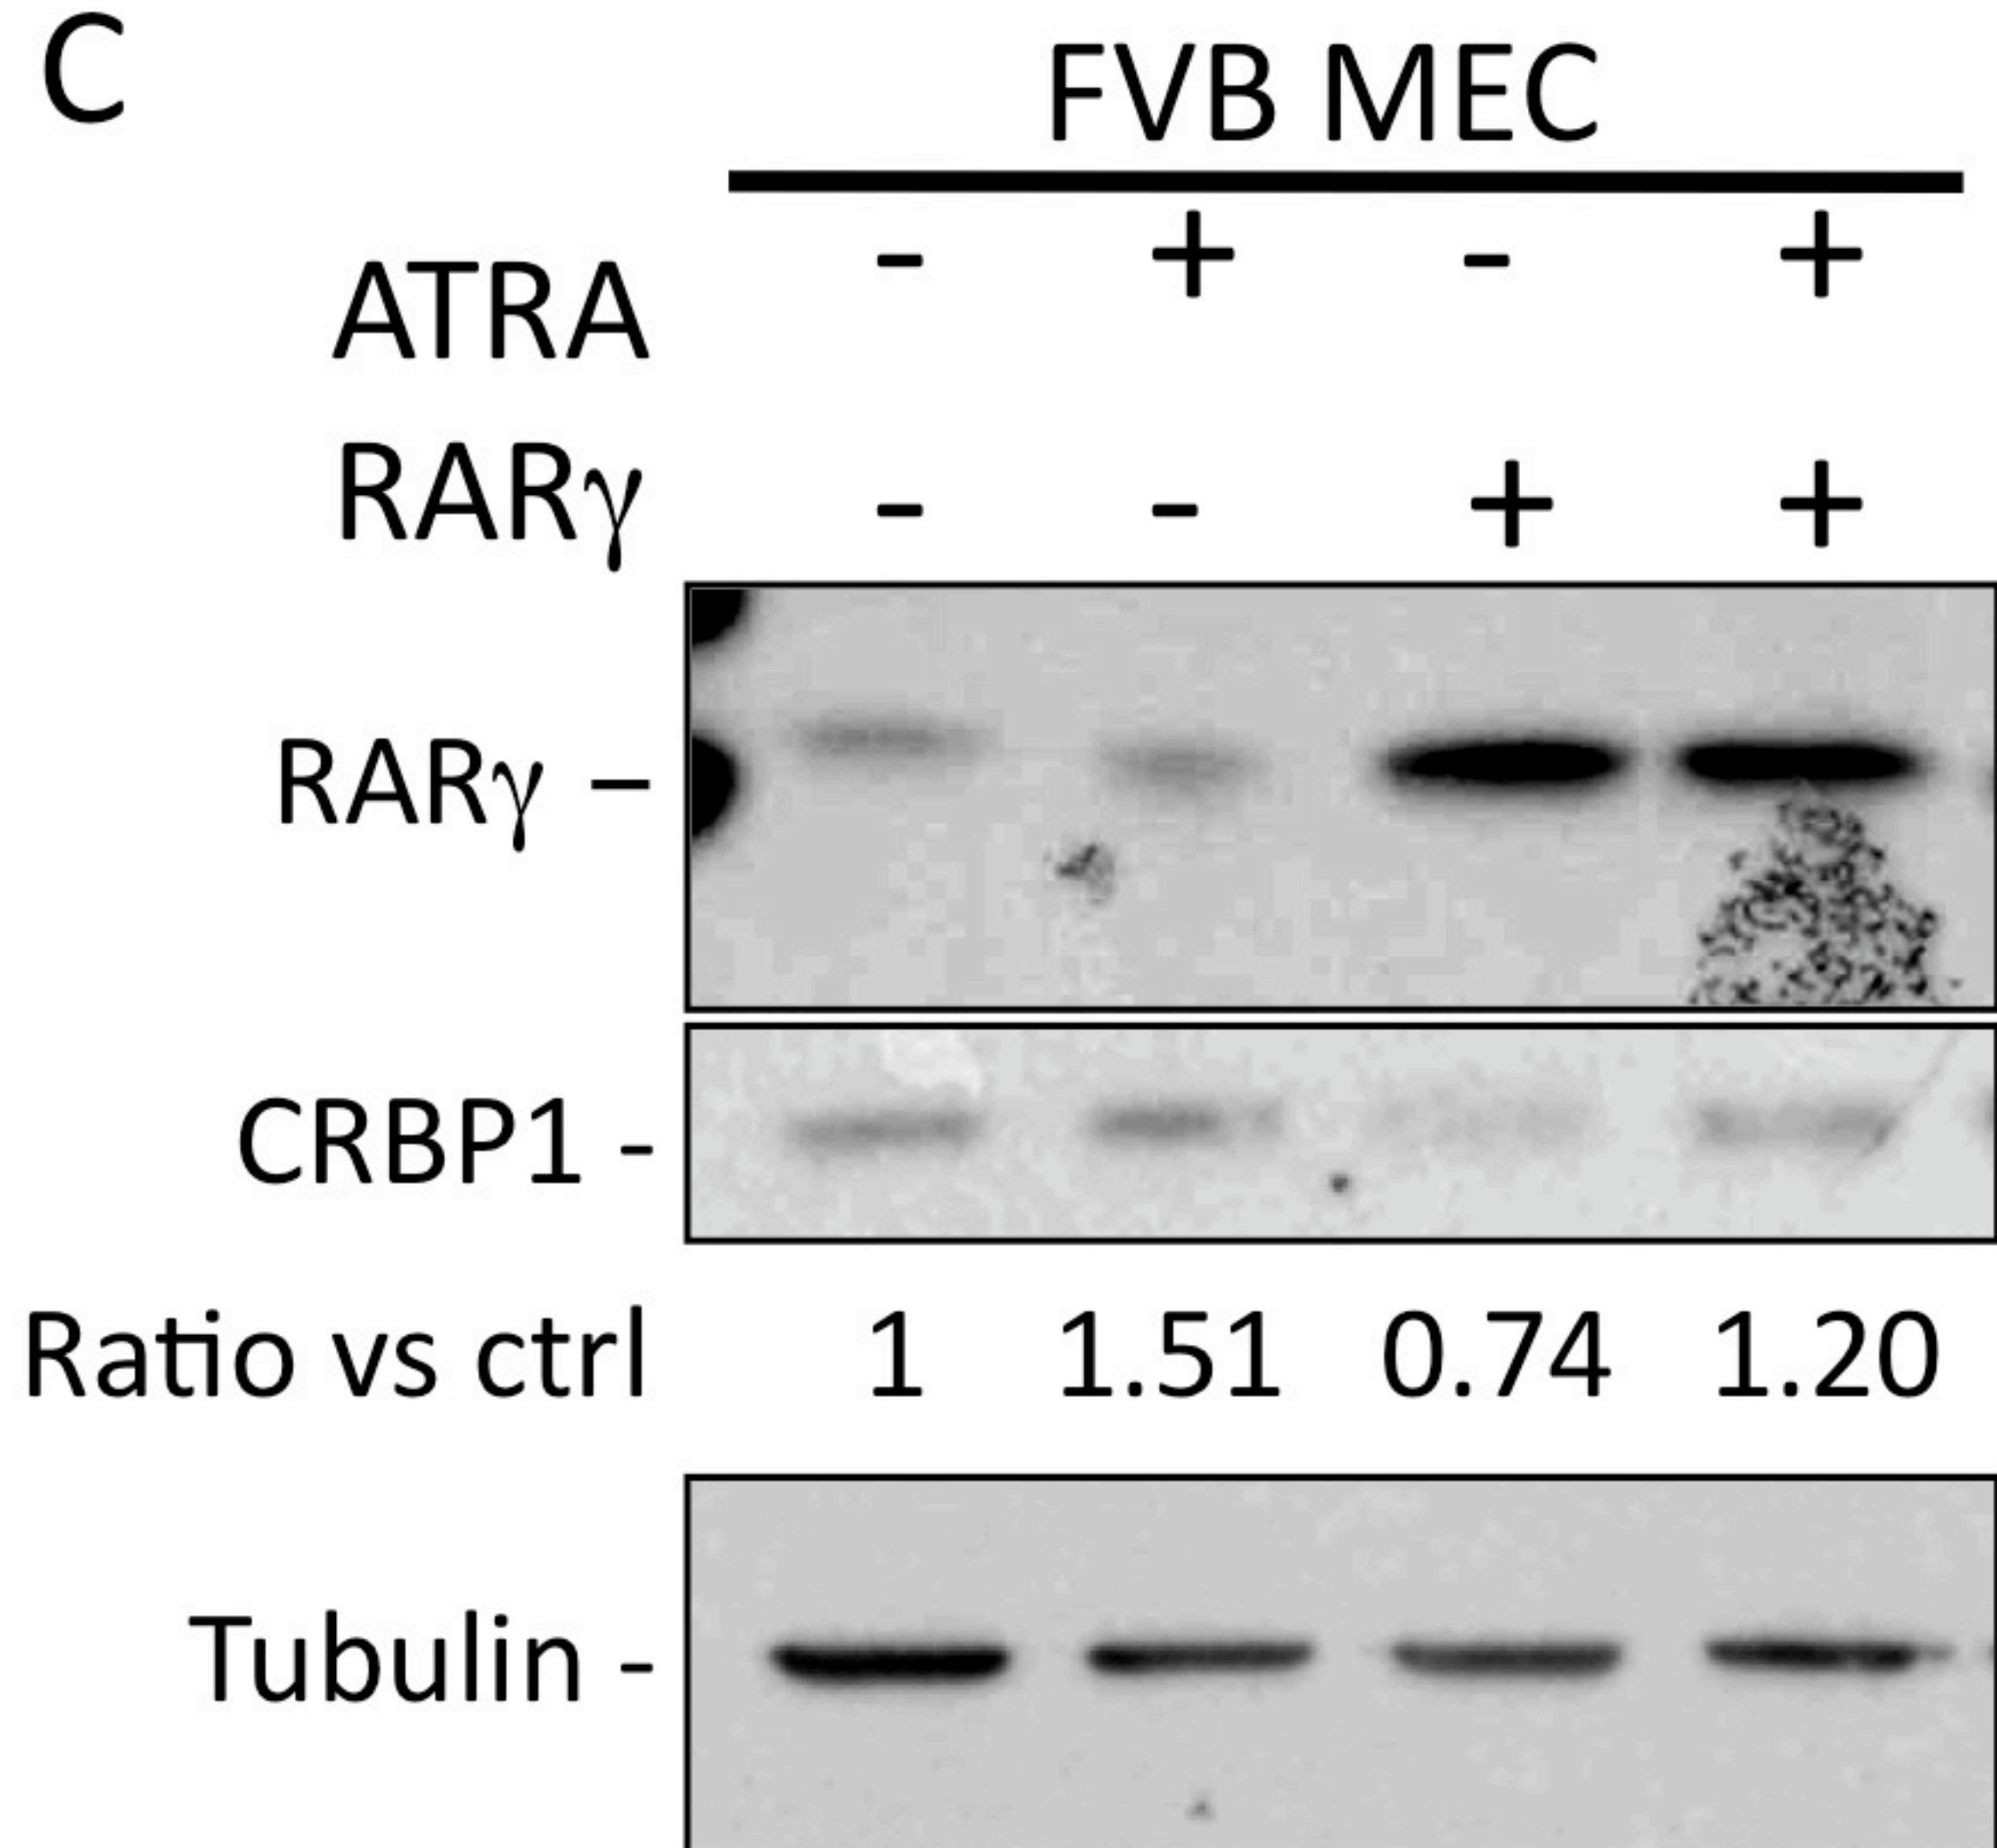

**D**

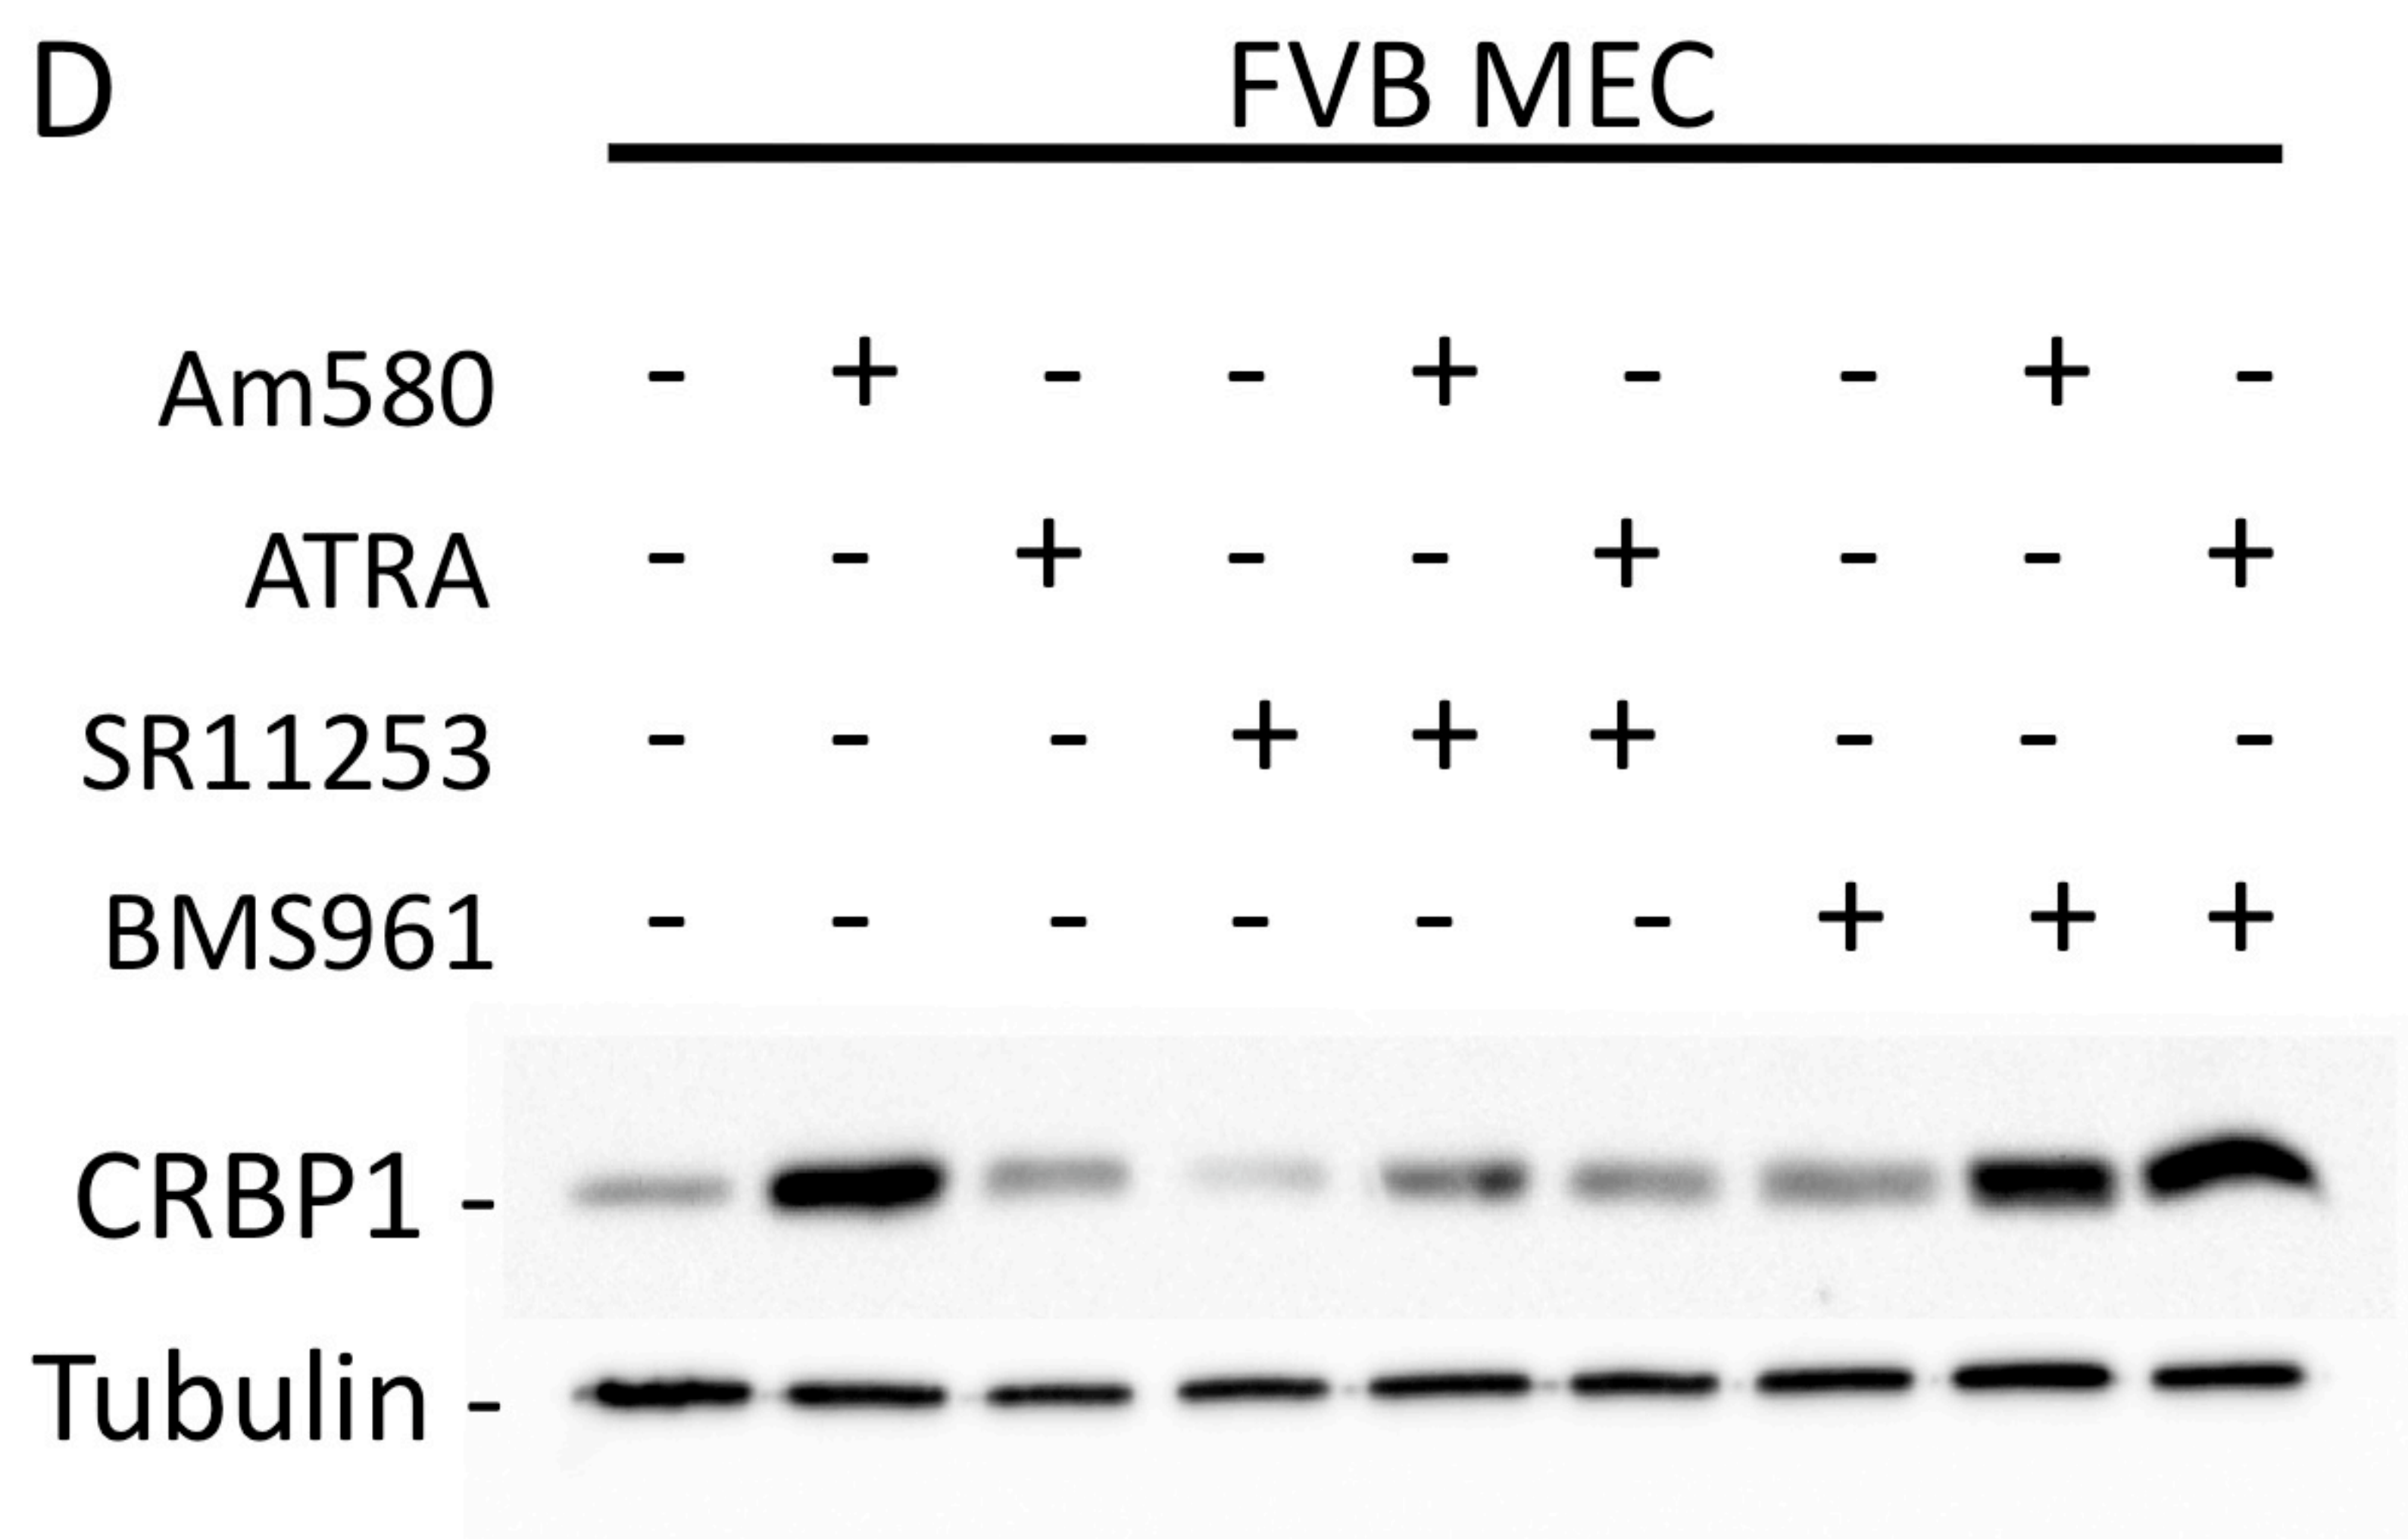

**E**

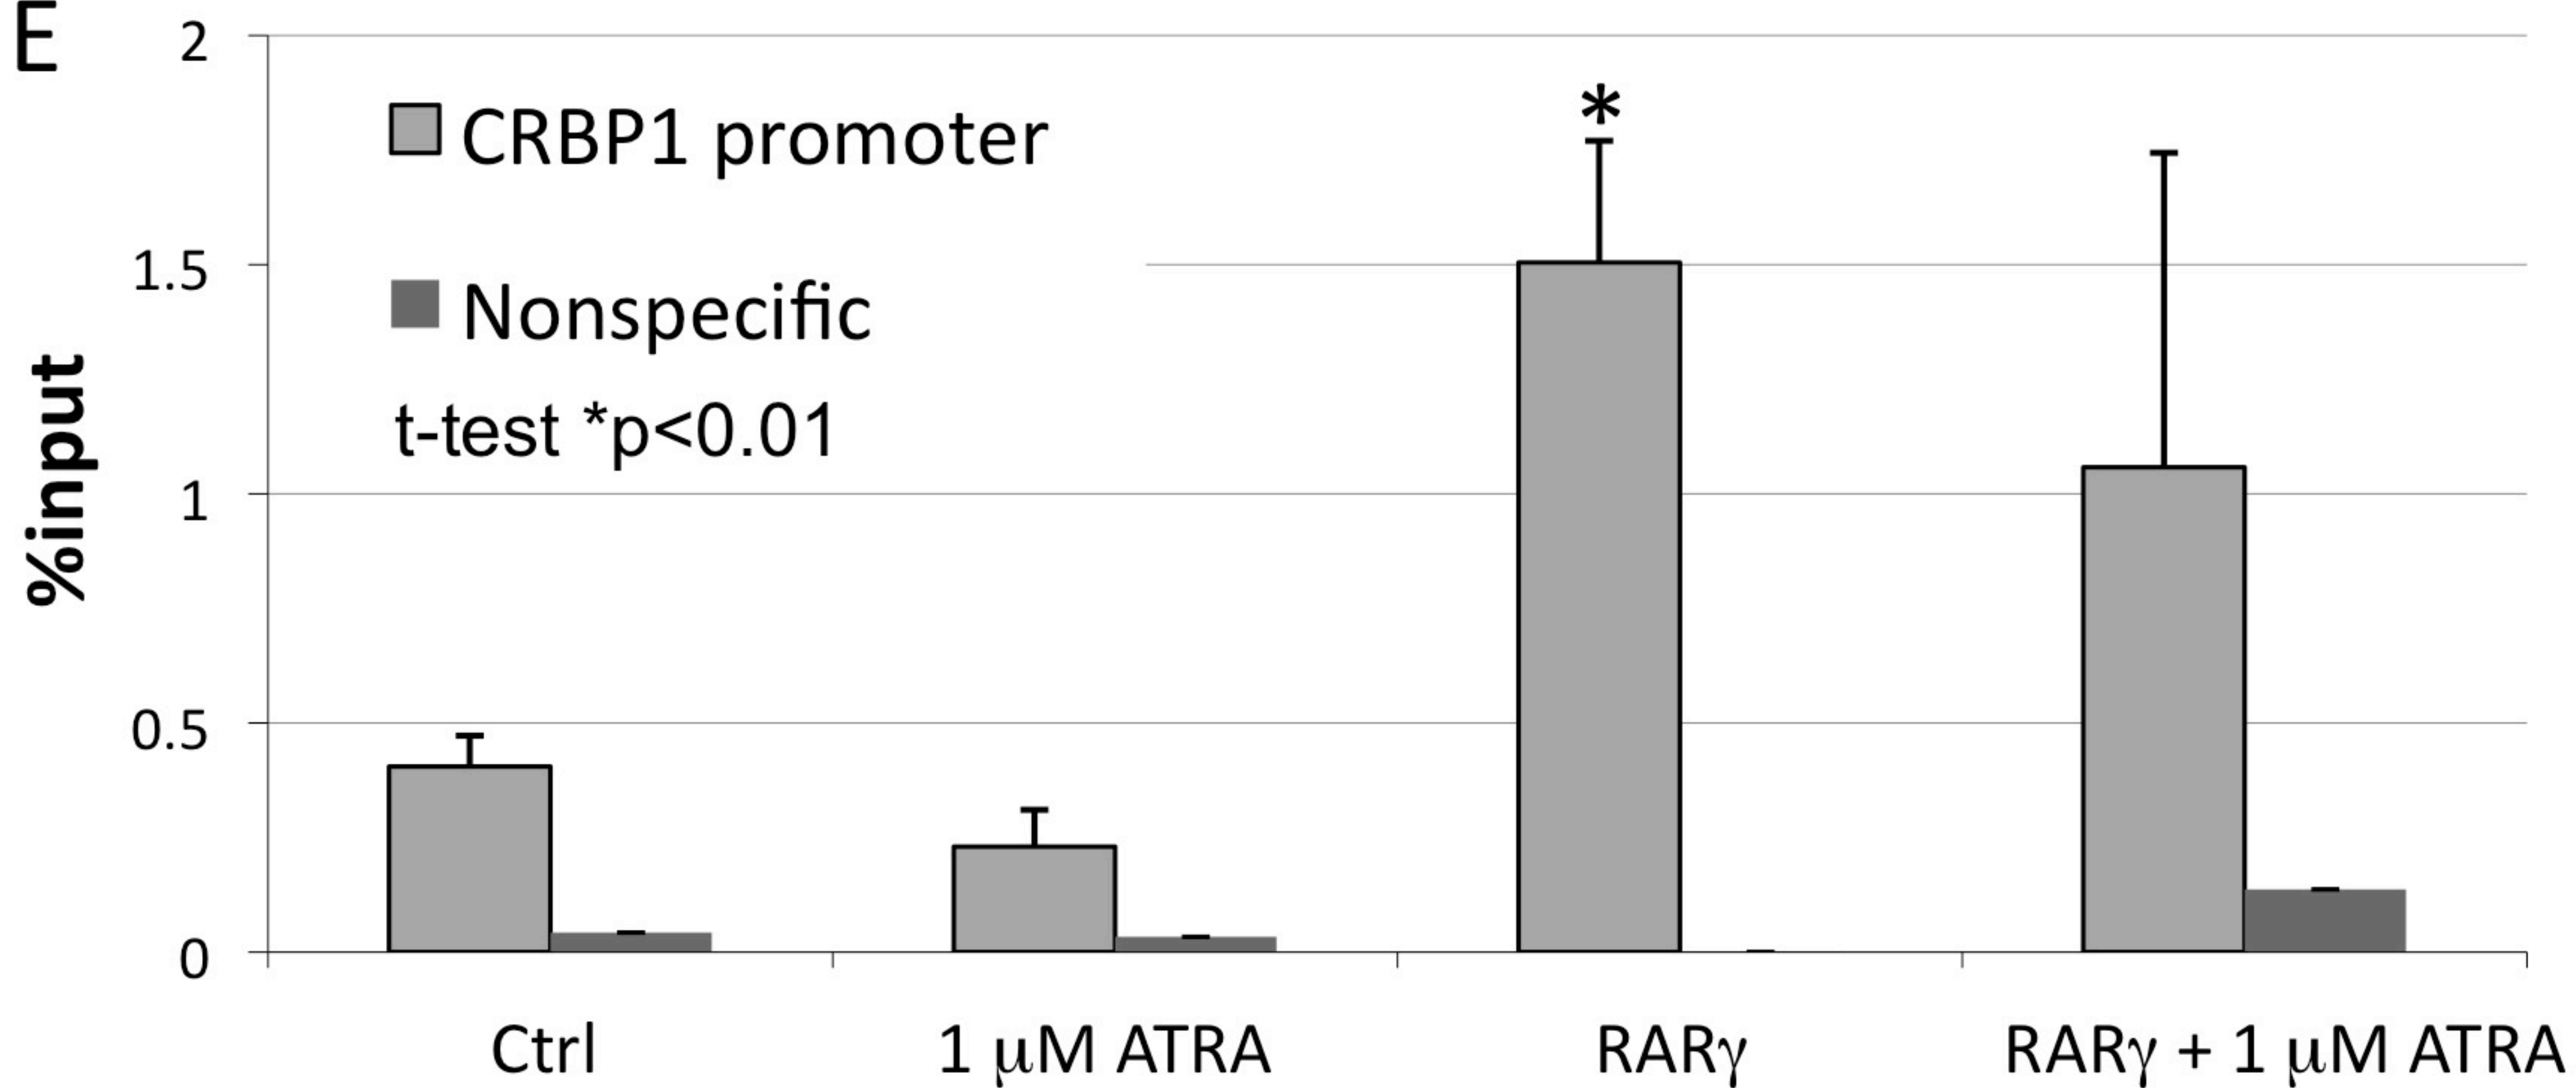

Supplement: MOESM10 [file 9703162]
